# Supplementary material for: ELFN1-AS1: A Novel Primate Gene with Possible MicroRNA Function Expressed Predominantly in Human Tumors
Source: Hindawi journal article supplement (doi:10.1155/2014/398097), 2014-01-01
Supplement: f1 [file 398097.f1.zip]

-1000 -990 -980 -970 -960 -950 -940 -930  
|...|...|...|...|...|...|...|...|...|...|...|...|...|...|...  
gctctattcctcagcctccactggaccctgagggtctccaggcaggacggtgcctcctccatctgcctagtgtctgtga  
E2F/1 E2F/2 YY1/1  
-920 -910 -900 -890 -880 -870 -860 -850  
|...|...|...|...|...|...|...|...|...|...|...|...|...|...|...  
gcctggacacagaggatgtggcgaccgagctgtaggcggggaaagcccaggcaggaaggaccctgcagacggggctggag  
E2F/3 YY1/2 YY1/3  
-840 -830 -820 -810 -800 -790 -780 -770  
|...|...|...|...|...|...|...|...|...|...|...|...|...|...|...  
gtacgtccggggagcgaggcatcccgctgggtcctgtctcccattggaccacccaccactaccctcgagataagggg  
E2F/4 YY1/4  
-760 -750 -740 -730 -720 -710 -700 -690  
|...|...|...|...|...|...|...|...|...|...|...|...|...|...|...  
ccctggtgtgcgacctcactcccgggcctgtgttttcctgcaggatagagaaatgggtgtgtttgctgttaata  
E2F/5  
-680 -670 -660 -650 -640 -630 -620 -610  
|...|...|...|...|...|...|...|...|...|...|...|...|...|...|...  
tgtggatttacagtcggcctctgtcaccgagccgtggcctgscgggcagccagctgggtgtatttcactgatattgacgt  
E2F/6 YY1/5  
-600 -590 -580 -570 -560 -550 -540 -530  
|...|...|...|...|...|...|...|...|...|...|...|...|...|...|...  
ttgcaactagtctgcactgaaagcggtttaaattagagaaaaaaaaataatgatgtaaaatgggttttttctcctttg  
-520 -510 -500 -490 -480 -470 -460 -450  
|...|...|...|...|...|...|...|...|...|...|...|...|...|...|...  
gaaacttcataaagaacaattttgttcggctcctggagaagagtctattttctgatttaaagagaggagagaagtcagacg  
YY1/6 E2F/7 E2F/8  
-440 -430 -420 -410 -400 -390 -380 -370  
|...|...|...|...|...|...|...|...|...|...|...|...|...|...|...  
gcatgggggtacaacgaggtcctagcgggcctcggggagctaaccagggttgccctggagtgccaggggagcggcaaa  
YY1/7 YY1/8 E-box/1  
-360 -350 -340 -330 -320 -310 -300 -290  
|...|...|...|...|...|...|...|...|...|...|...|...|...|...|...  
gcccagccgggagacctggctaggccactcaaaaatggctcagggggctgcttggttaggaaaatgggtcccac  
YY1/9 YY1/10  
-280 -270 -260 -250 -240 -230 -220 -210  
|...|...|...|...|...|...|...|...|...|...|...|...|...|...|...  
gtggtccggttgatgtgaaatccaacatcacgggagtcagcgctgtcttggtcaacatcatgccgtgtgcacctgccag  
YY1/11 YY1/12  
-200 -190 -180 -170 -160 -150 -140 -130  
|...|...|...|...|...|...|...|...|...|...|...|...|...|...|...  
ctgcaccacgcccagccctccatccctcccaacatccctgcaccgtgccagacaacctgtgccaatgctgggattt  
E-box/2 E2F/9 YY1/13 E2F/10  
-120 -110 -100 -90 -80 -70 -60 -50  
|...|...|...|...|...|...|...|...|...|...|...|...|...|...|...  
agctttccaagcctcctgggggccaggtctcaggcagagcgctgtgcccggggcggggcaaggccatggggcgg  
YY1/14 E2F/10 GABP GC-box E2F/11 E2F/12  
-40 -30 -20 -10 +1 10 20 30  
|...|...|...|...|...|...|...|...|...|...|...|...|...|...|...  
atggcgtccggctgtgccggcctccggaaggaggggtotGGCCA GCGGCCGC ACAGGAAGCGTGTAGGAAGCGTGGCG  
40 50 60 70 80 90 100 110  
|...|...|...|...|...|...|...|...|...|...|...|...|...|...|...  
CCTCAGCCACAATCGTAATCACCTTTAATCTCTTGCTCAAAATAACCCAAAGTCAAGgtaaggaggattacagggcctaa  
E2F/13  
120 130 140 150 160 170 180 190  
|...|...|...|...|...|...|...|...|...|...|...|...|...|...|...  
gagccctcaccacaggcacagggaggaggttgggggctggggctgctccggctctcctgggcccggagctgagggctg  
E-box/3 YY1/15 E-box/4 E-box/5 E-box/6  
200 210 220 230 240 250 260 270  
|...|...|...|...|...|...|...|...|...|...|...|...|...|...|...  
gagggtgcatgacatgggggtcacgtgtgtgtgtgcatgtgtgtttgtggaacatgtatacctgtgtccaccac  
E-box/7 E-box/8  
280 290 300 310 320 330 340 350  
|...|...|...|...|...|...|...|...|...|...|...|...|...|...|...  
acacgtgttttgaacacgtgagccctcgatgtgtgtgtgccaggtgtgtgtgtgtgtgtacagatgtgtgtgcacaggtgt  
YY1/16  
360 370 380 390 400 410 420 430  
|...|...|...|...|...|...|...|...|...|...|...|...|...|...|...  
gtacacagggcaggtgattgtgtacatgagtgcgaggccatgctcactggggcctgggcagagcaggtgtcactgagg  
440 450 460 470 480 490 500  
|...|...|...|...|...|...|...|...|...|...|...|...|...|...|...  
acccctgtctgggcagcgaggcctggggctctggtgcgtctggggctgggtggaggcaggt
