# Supplementary figures and images for: ELFN1-AS1: A Novel Primate Gene with Possible MicroRNA Function Expressed Predominantly in Human Tumors
Source: Hindawi journal article supplement (doi:10.1155/2014/398097), 2014-01-01

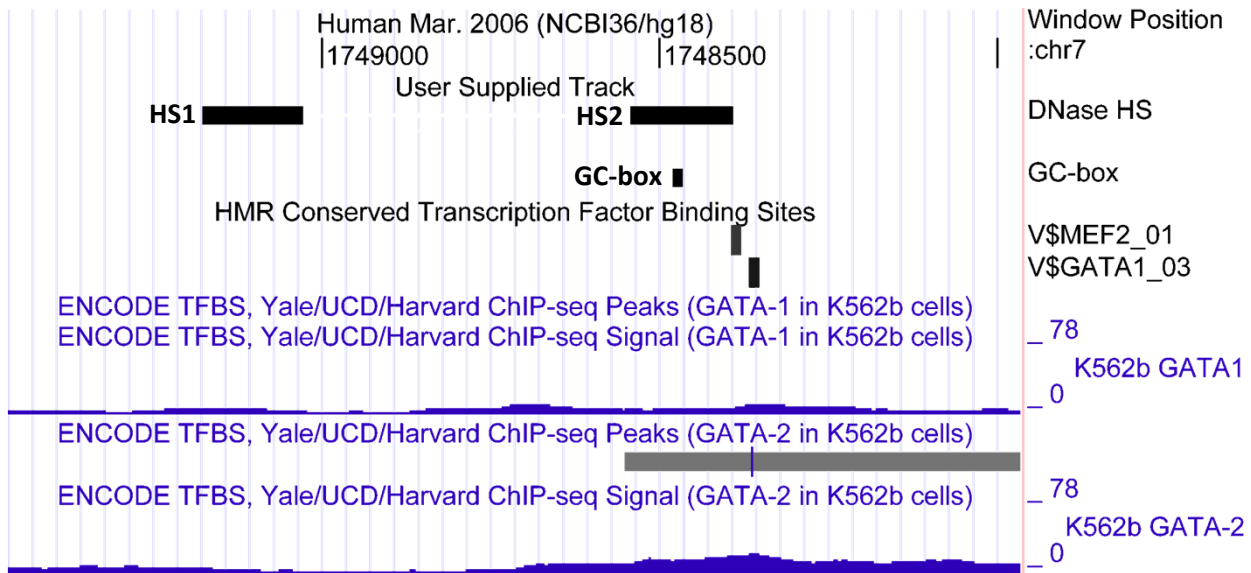

Supplement: f1 [file 398097.f1.zip]

# YY1

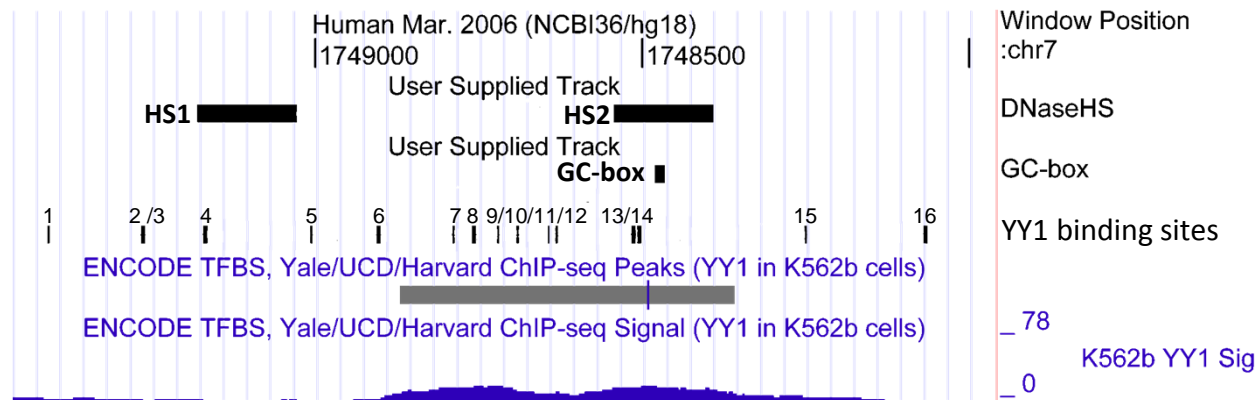

Supplement: f1 [file 398097.f1.zip]

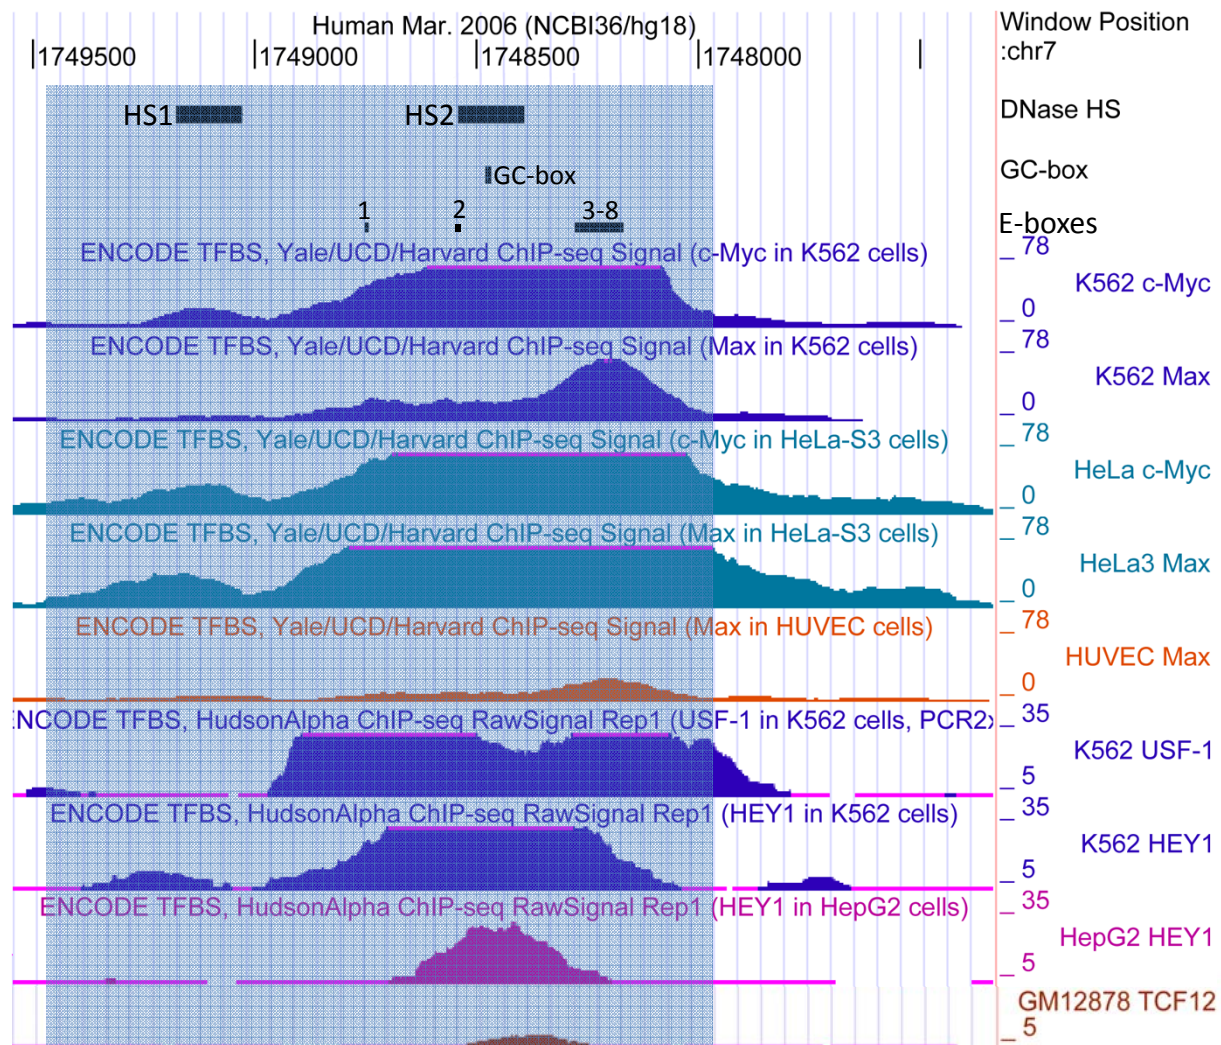

Supplement: f1 [file 398097.f1.zip]

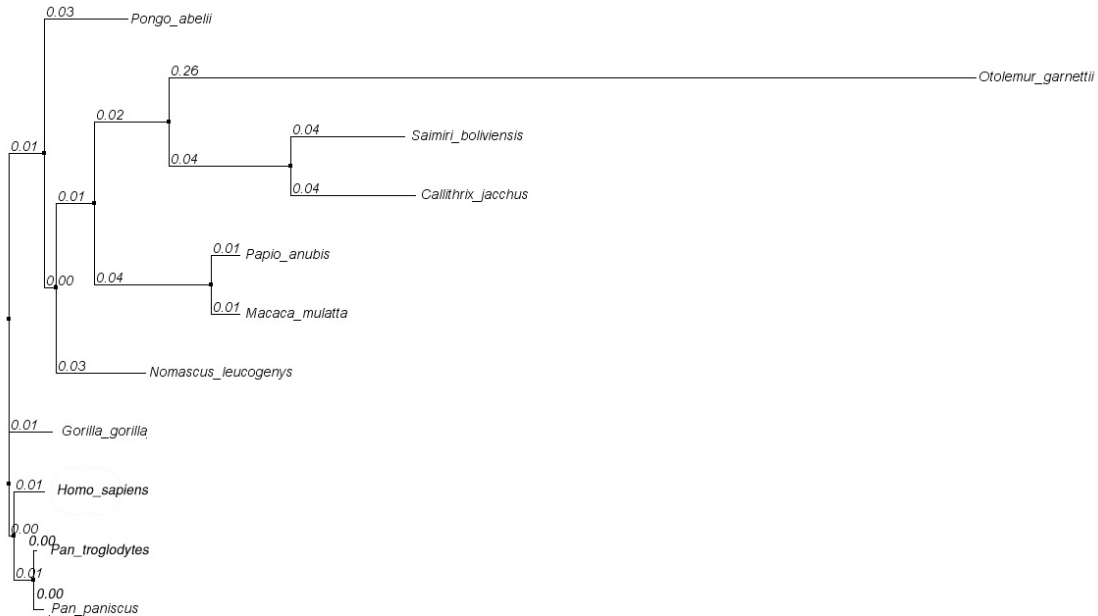

Supplement: f1 [file 398097.f1.zip]

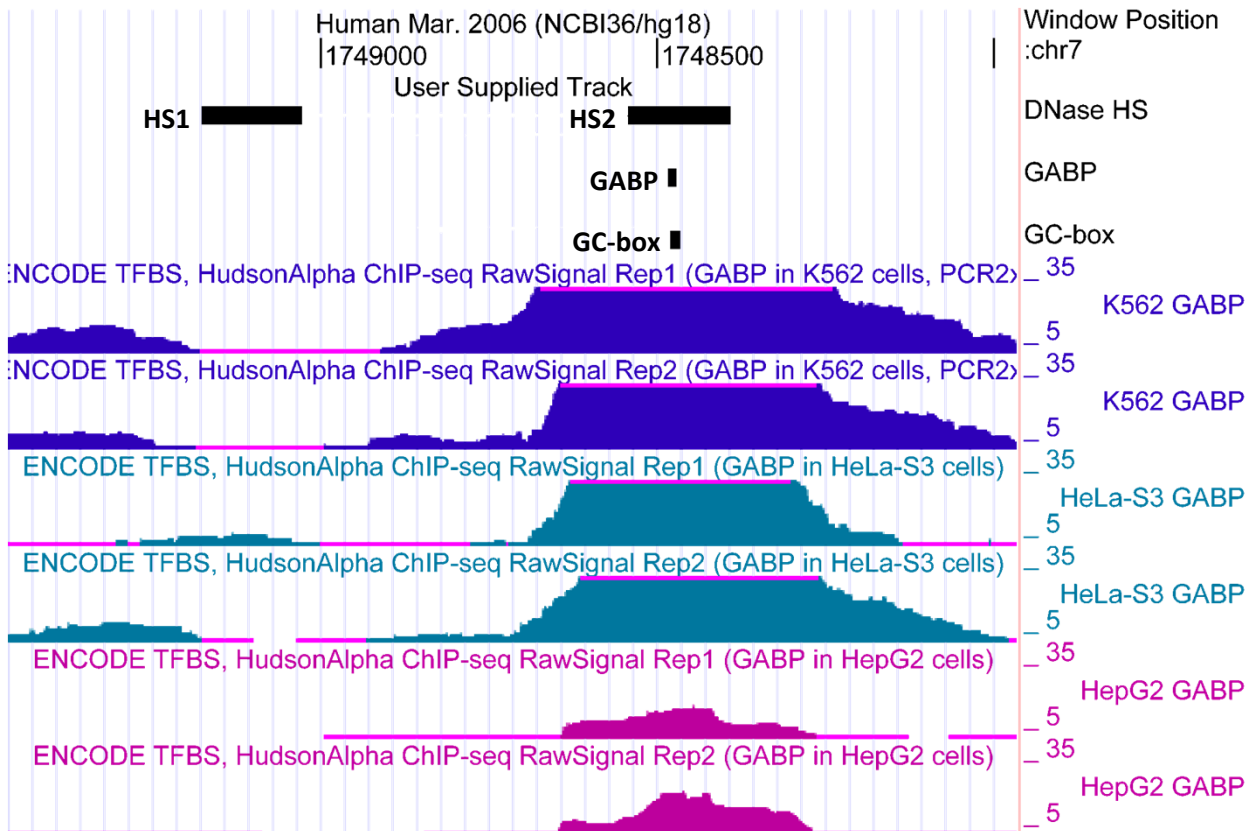

Supplement: f1 [file 398097.f1.zip]

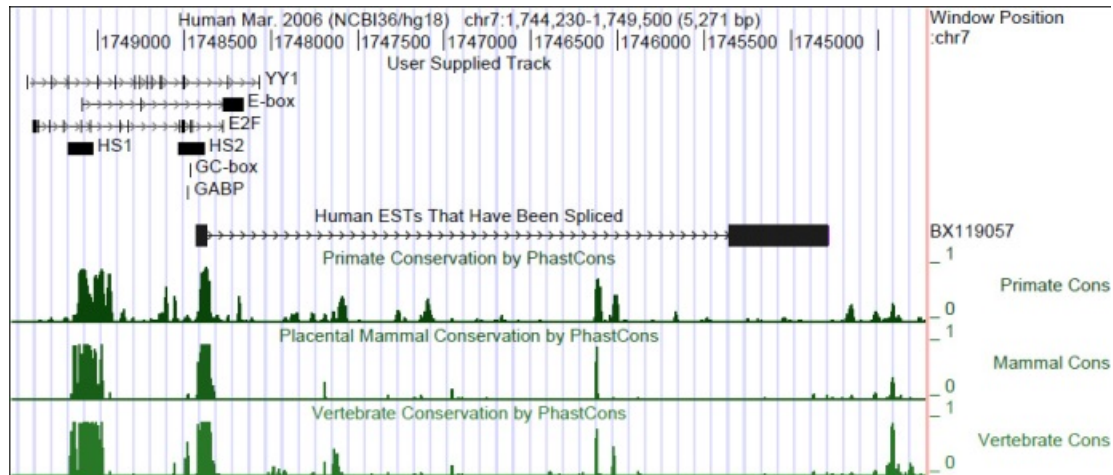

Supplement: f1 [file 398097.f1.zip]

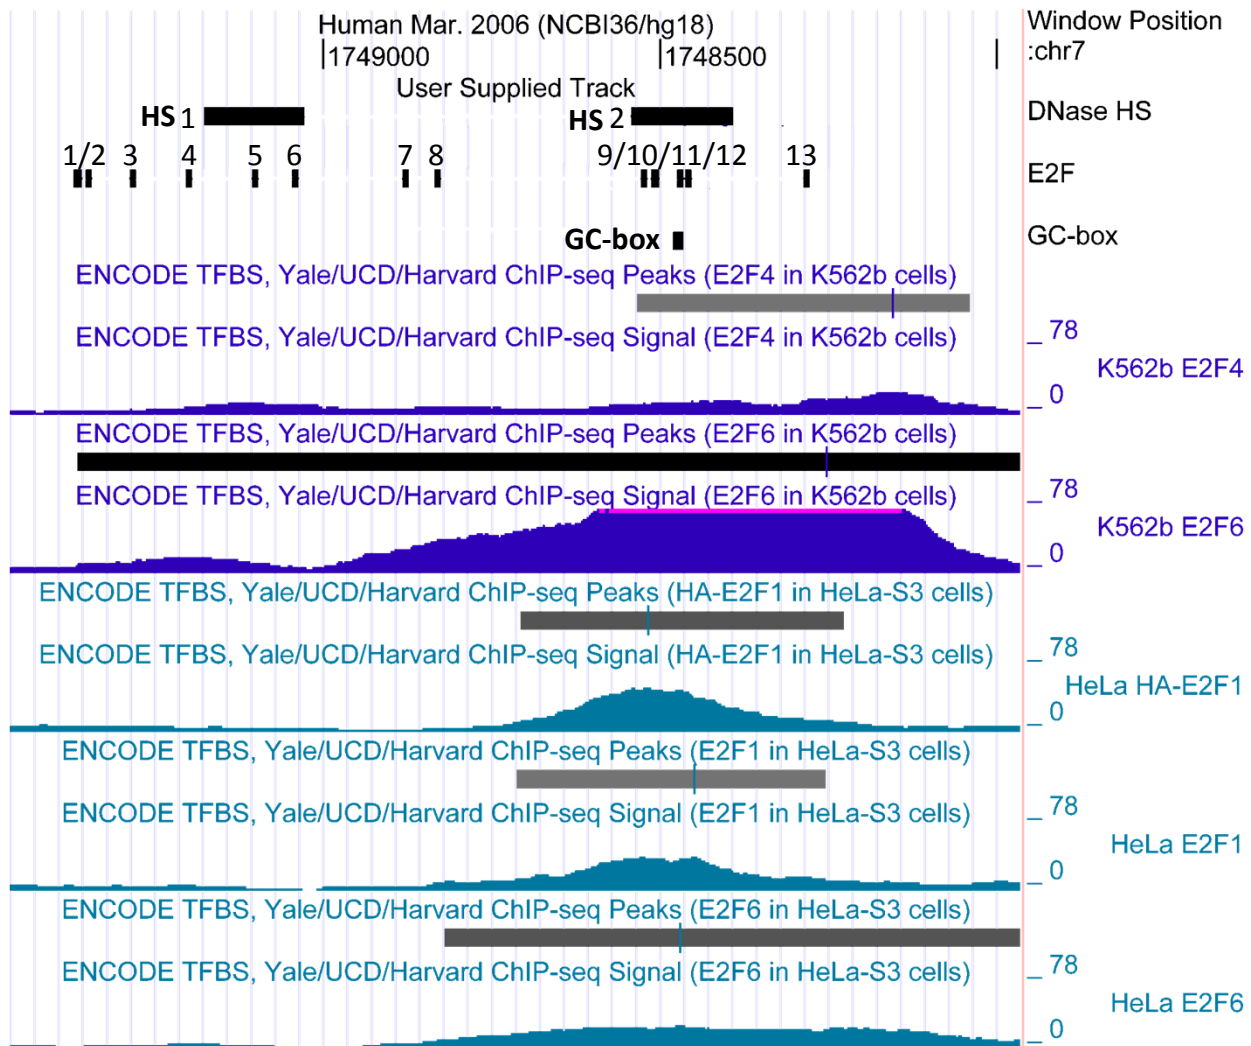

Supplement: f1 [file 398097.f1.zip]
